1 The evolution of mechanisms to produce phenotypic heterogeneity in  
2 microorganisms

3

4 Guy Alexander Cooper<sup>\*1,2</sup>, Ming Liu<sup>2</sup>, Jorge Peña<sup>3</sup>, and Stuart Andrew West<sup>2</sup>

5 <sup>1</sup>St. John's College, Oxford, OX1 3JP, United Kingdom

6 <sup>2</sup>Department of Zoology, University of Oxford, Oxford, OX1 3SZ, United Kingdom

7 <sup>3</sup>Institute for Advanced Study in Toulouse, University of Toulouse Capitole, Toulouse,  
8 31080 Cedex 6, France

9

10 **ABSTRACT**

11 In bacteria and other microorganisms, the cells within a population often show extreme  
12 phenotypic variation. Different species use different mechanisms to determine how  
13 distinct phenotypes are allocated between individuals, including coordinated, random,  
14 and genetic determination. However, it is not clear if this diversity in mechanisms is  
15 adaptive—arising because different mechanisms are favoured in different  
16 environments—or is merely the result of non-adaptive artifacts of evolution. We use  
17 theoretical models to analyse the relative advantages of the two dominant mechanisms  
18 to divide labour between reproductives and helpers in microorganisms. We show that  
19 coordinated specialisation is more likely to evolve over random specialisation in well-  
20 mixed groups when: (i) social groups are small; (ii) helping is more “essential”; and (iii)  
21 there is a low metabolic cost to coordination. We find analogous results when we allow  
22 for spatial structure with a more detailed model of cellular filaments. More generally, this

---

\* Corresponding author: [guy.cooper@zoo.ox.ac.uk](mailto:guy.cooper@zoo.ox.ac.uk)

23 work shows how diversity in the mechanisms to produce phenotypic heterogeneity  
24 could have arisen as adaptations to different environments.

25

26 Key words: division of labour, random specialisation, phenotypic noise, adaptive coin-  
27 flipping, coordination, cellular differentiation, bistability, cyanobacteria, social microbes

28

## 29 **INTRODUCTION**

30 Different species use different mechanisms to produce adaptive phenotypic  
31 heterogeneity (Fig. 1)<sup>1-5</sup>. In some cases, there is coordination across individuals to  
32 determine which individual will perform which role (*coordinated specialisation*)<sup>1,6</sup>. This  
33 coordination could use signals, cues, or a developmental programme to provide  
34 information about the phenotypes adopted by other individuals in the group<sup>7</sup>. For  
35 example, when honey bee workers feed royal jelly to larvae to produce reproductive  
36 queens (Fig. 1A), or when the local density of a signalling molecule determines whether  
37 cyanobacteria cells develop into sterile nitrogen-fixing heterocysts (Fig. 1B)<sup>8-10</sup>. In other  
38 cases, each individual adopts a helper phenotype with a certain probability,  
39 independently and without knowledge of the phenotypes adopted by other individuals  
40 (*random specialisation*)<sup>2,5,11,12</sup>. For example, in *Salmonella enterica* co-infections,  
41 random biochemical fluctuations within each cell's cytoplasm are used to determine  
42 whether the cell sacrifices itself to trigger an inflammatory response that eliminates  
43 competitor species (Fig. 1D)<sup>12,13</sup>. In yet further cases, phenotype is influenced by the  
44 individual's genotype (genetic control). For instance, in some ant societies, whether  
45 individuals develop into queens, major or minor workers can be determined, in part, by

46 their genes (Fig. 1C)<sup>3,14–16</sup>. Across the tree of life some species employ one mechanism  
47 to produce phenotypic heterogeneity whereas in other species mixed forms exist with a  
48 combination of coordinated specialisation, random specialisation, or genetic  
49 control<sup>3,15,17–22</sup>.  
50

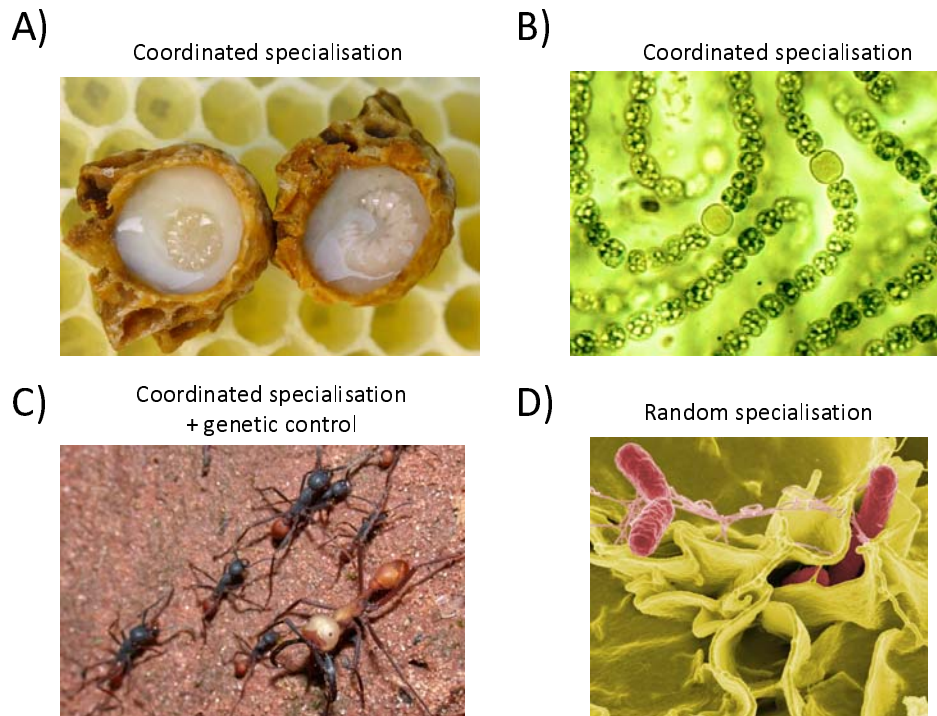

51

52 **Figure 1. Different mechanisms to produce phenotypic heterogeneity in nature.** A)  
53 In honey bee hives (*Apis mellifera*), larvae develop as sterile workers unless they are  
54 fed large amounts of royal jelly by adult workers (coordinated specialisation)<sup>8</sup> (Photo by  
55 Wausberg via the Wikimedia Commons.) B) In *A. cylindrica* filaments (cyanobacteria),  
56 some individuals develop into sterile nitrogen fixers (larger, round cells) if the amount of  
57 nitrogen fixed by their neighbours is insufficient (coordinated specialisation). This leads  
58 to a precise allocation of labour, with nitrogen-fixing cells distributed at fixed intervals  
59 along the filament<sup>9</sup> (Picture taken by Robert Calentine.) C) In the army ant (*Eciton*  
60 *Burchelli*), whether individual ants become a major or minor worker has a genetic  
61 component (genetic control)<sup>16</sup> (Photo by Alex Wild via the Wikimedia Commons,  
62 cropped.) D) In *S. enterica* infections (serovar Typhymurium), each cell amplifies intra-  
63 cellular noise to determine whether it will self-sacrifice and trigger an inflammatory  
64 response that eliminates competing strains (random specialisation)<sup>13</sup> (Photo by Rocky  
65 Mountain Laboratories, NIAID, NIH via Wikimedia Commons.)

66

67 We lack general evolutionary explanations for why different species use different  
68 mechanisms to produce phenotypic heterogeneity<sup>2,3,23,24</sup>. Previous work has focused on  
69 non-reproductive division of labour in the social insects, and the proximate mechanisms  
70 that lead to different worker castes<sup>6,16,25–29</sup>. However, the focus in that literature is on a  
71 different question – how different proximate mechanisms can produce coordinated  
72 specialisation – rather than the broader question of whether coordinated specialisation  
73 should be favoured over random specialisation or genetic control in the first place. It is  
74 with reproductive division of labour that these three very different mechanisms have  
75 been observed in different species and for which there is an absence of evolutionary  
76 explanations<sup>2,3,23,24,30</sup>.

77

78 Reproductive division of labour in bacteria and other social microbes offers an excellent  
79 opportunity for studying why different mechanisms to produce phenotypic heterogeneity  
80 are favoured in different species<sup>1,2</sup>. Reproductive division of labour occurs when social  
81 groups are composed of more cooperative ‘helpers’ who gain indirect fitness benefits by  
82 the aid they provide to less cooperative ‘reproductives’. Across microbes, the two  
83 primary mechanisms used to produce reproductive division of labour are coordinated  
84 and random specialisation (Fig. 2). Furthermore, while the form of cooperation and life  
85 histories of social microbes share many similarities, they also vary in factors that could  
86 influence the evolution of division of labour, such as social group size<sup>31,32</sup>.

87

88 We develop theoretical models to examine whether the relative advantages of random  
89 and coordinated specialisation can depend upon social or environmental conditions.  
90 Our aim here is to use reproductive division of labour in microbes as a ‘test system’ to  
91 address the broader question of whether evolutionary models can explain the diversity  
92 in the mechanisms that produce phenotypic heterogeneity more broadly.  
93

A) Random specialisation

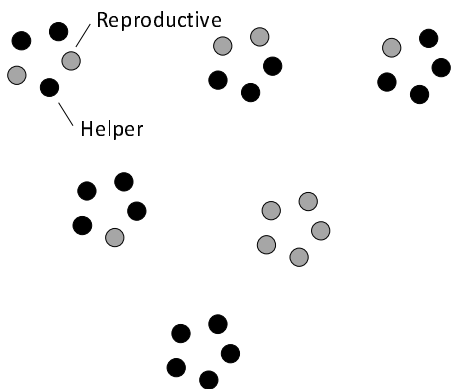

B) Fully coordinated specialisation

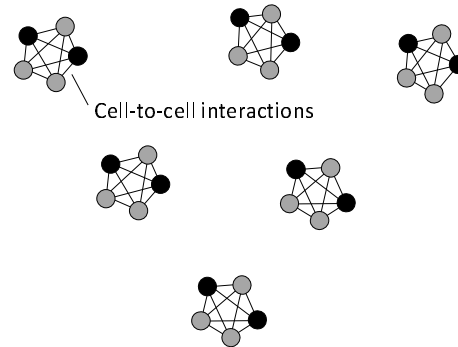

94

95 **Figure 2. Mechanisms to produce reproductive division of labour in clonal**  
96 **groups.** We examine the relative advantages and disadvantages of the two key  
97 mechanisms to produce reproductive division of labour in social microorganisms<sup>1,5,11,33</sup>.  
98 (A) Random specialisation occurs when cells randomly specialise into helpers or  
99 reproductives independently of one another. This can occur when a genetic feedback  
100 circuit is used to amplify small molecular fluctuations in the cytoplasm of each cell  
101 (phenotypic noise)<sup>4,11,12,34–36</sup>. (B) Coordinated specialisation occurs when cells interact  
102 with one another, and share (or gain) phenotypic information while they are  
103 differentiating. This could occur through the secretion and detection of extracellular  
104 molecules (signals or cues), or with a shared developmental programme  
105 (epigenetics)<sup>1,2,25</sup>.

106

## 107 RESULTS

108 We compare the relative fitness advantages of reproductive division of labour with either  
109 coordinated or random specialisation. Our first aim is to capture the problem in a

110 deliberately simple model, which is easy to interpret, and can be applied across diverse  
111 microbe species<sup>37,38</sup>.

112

113 We begin by assuming that coordinated specialisation always produces the optimal  
114 proportion of helpers and reproductives (fully coordinated specialisation) and that there  
115 is no within-group spatial structure (well-mixed groups). We then test the robustness of  
116 our results by examining several alternate models for different biological scenarios and  
117 by developing a more detailed model of growing cyanobacteria filaments that includes  
118 the effects of within-group spatial structure. Throughout, we assume a form of  
119 cooperation that is common in microbes, where some individuals produce a ‘public  
120 good’ that benefits all cells.

121

## 122 **Random specialisation vs fully coordinated specialisation**

123 We assume that a single cell arrives on an empty patch and, through a fixed series of  
124 replications, produces a clonal group of  $n$  individuals that consists of  $k$  sterile helpers  
125 and  $n - k$  pure reproductives ( $k \in \{0, 1, 2, \dots, n\}$ ). We denote group fecundity,  $g_{k,n}$ , as the  
126 reproductive success of a particular group in the absence of mechanism costs. This is  
127 measured as the per capita number of offspring that would disperse at the end of the  
128 group life cycle, given by

$$g_{k,n} = \frac{1}{n} (n - k) f_{k,n}, \quad (1)$$

129 where  $n - k$  is the number of reproductives in the group, and  $f_{k,n}$  is the fecundity of  
130 each reproductive in the absence of mechanism costs. We assume that  $f_{k,n}$  increases  
131 with the number of helpers in the whole group ( $k$ ).

132

133 Expression (1) highlights the trade-off between the number of reproductives in the group  
134  $(n - k)$ , which is higher when there are fewer helpers (lower  $k$ ), and the amount of help  
135 that those reproductives obtain ( $f_{k,n}$ ), which is higher when there are more helpers  
136 (higher  $k$ ). The balance of this trade-off often results in an optimal number of helpers,  
137  $k^*$ , that is intermediate (i.e.,  $0 < k^* < n$ ), giving  $g_{k^*,n}$  as the maximal reproductive  
138 success of the group.

139

140 In species that divide labour by coordination, the outcome of individual specialisation  
141 depends on the phenotypes of social group neighbours. Our first model is deliberately  
142 agnostic to the details of how phenotype information is shared between group members  
143 in order to facilitate predictions across different systems. For instance, individuals may  
144 share phenotype information via signalling between cells or with a common  
145 developmental programme (Fig. 2B)<sup>1,2,39</sup>. We make the simplifying assumption that  
146 individuals coordinate fully, so that coordinated groups always form with precisely the  
147 optimal number of helpers,  $k^*$ . The disadvantage of coordinated specialisation is that  
148 the mechanism could incur metabolic costs, such as the production of extracellular  
149 signalling molecules. The fitness of a group of coordinated specialisers is given by:

$$w_c = (1 - c_c)g_{k^*,n} , \quad (2)$$

150 where  $g_{k^*,n}$  is the group fecundity with the optimal number of helpers,  $k^*$ , and  $0 \leq c_c \leq 1$   
151 is the metabolic cost of coordination, whose form we leave unspecified but could in  
152 principle depend on further factors such as group size. A number of different models

153 have examined how different proximate mechanisms can produce coordinated division  
154 of labour in specific systems<sup>6,25,28,29</sup>.

155

156 In species that divide labour by random specialisation, each individual in the group  
157 independently becomes a helper with a given probability and a reproductive otherwise  
158 (Fig. 2A). Hence, the final number of helpers in the group is a binomial random variable.  
159 We assume that the probability of adopting a helper role is equal to the optimal  
160 proportion of helpers ( $p^* = k^*/n$ ). Thus, the expected fitness of a group of random  
161 specialisers is given by:

$$w_R = (1 - c_R) \sum_{k=0}^n \binom{n}{k} p^{*k} (1 - p^*)^{n-k} g_{k,n}, \quad (3)$$

162 where  $0 \leq c_R \leq 1$  is the metabolic cost of random specialisation, which we assume is  
163 independent of the number of helpers in the group,  $k$ . The potential advantage of  
164 random specialisation is that there may be fewer upfront metabolic costs from, for  
165 example, between cell signalling (i.e., if  $c_R < c_C$  holds). The downside of random  
166 specialisation is that groups form most of the time with fewer or more helpers than is  
167 optimal (developmental stochasticity). In principle, the probability of becoming a helper  
168 could be transiently regulated by environmental cues to produce on average more or  
169 fewer helpers when this is more favourable. However, throughout our analysis we  
170 assume a stable environment and ignore such regulation.

171

172 We need to specify how reproductive fecundity depends on the number of helpers in the  
173 group. We focus here on one of the most common forms of cooperation in microbes,  
174 where individuals secrete factors that provide a benefit to the local population of cells



175 (“public goods”) <sup>40</sup>. We assume that the amount of public good in the social group  
176 depends linearly on the number of helpers in the group and is “consumed” by all group  
177 members equally <sup>41,42</sup>. An example of such a public good is found in *Bacillus subtilis*  
178 populations, where only a subset of cells (helpers) produce and secrete proteases that  
179 degrade proteins into smaller peptides, but where these are then re-absorbed as a  
180 nutrient source by all cells <sup>43</sup>.

181

182 We allow the relative importance of producing public goods to vary between species.  
183 Each reproductive has a baseline fecundity,  $b \geq 0$ , that is independent of the amount of  
184 public good in the group. The fecundity benefit of helpers scales according to  $h \geq 0$  as  
185 the amount of public good in the group increases. When reproductives have no baseline  
186 fecundity ( $b = 0$ ), we say that cooperation is essential. When baseline fecundity is non-  
187 zero ( $b > 0$ ), cooperation is non-essential and the ratio  $h/b$  provides a useful metric for  
188 the relative importance of cooperation.

189

190 Our assumptions give the following expression for the fecundity of a reproductive:

$$f_{k,n} = b + h \frac{k}{n}. \quad (4)$$

191 By substituting Equation 4 into Equations 1-3, we can determine when the fitness of  
192 coordinated specialisation is greater than the fitness of random specialisation (i.e.,  
193  $w_C > w_R$ ), which gives the simplified condition:

$$\gamma < \frac{h - b}{n(h + b)}, \quad (5)$$

194 where  $\gamma = (c_C - c_R)/(1 - c_R)$  captures the relative change in metabolic costs paid when  
195 switching to coordinated specialisation from random specialisation. If  $h < b$ , then sterile  
196 helpers are disadvantageous and the group is composed of all reproductives ( $k^* = 0$ ).  
197 Thus, division of labour with sterile helpers is favoured to evolve only when  $h > b$ , which  
198 we will assume henceforth (Supplementary Section C). Condition (5) specifies that  
199 coordinated specialisation is favoured when the relative change in metabolic costs of  
200 switching from random specialisation to coordination ( $\gamma$ ), is less than the fecundity  
201 benefits gained from doing so (right-hand side). The condition can be used to predict  
202 how key environmental and ecological factors will influence which labour-dividing  
203 mechanism is more likely to evolve (Fig. 3).

204

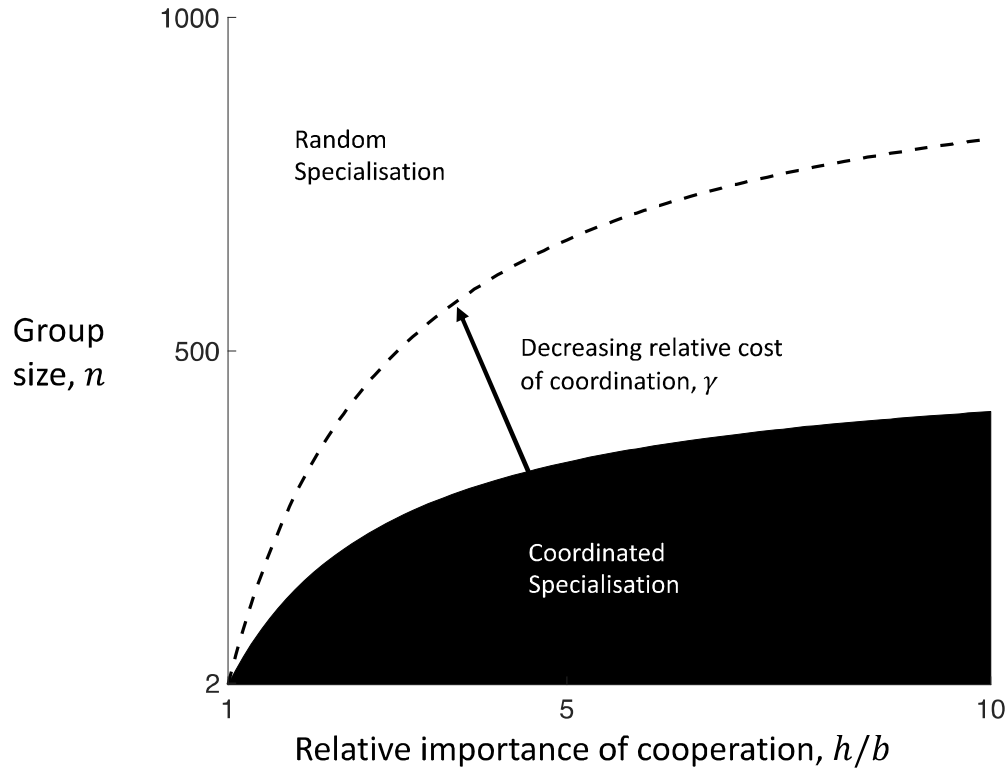

206 **Figure 3. Random versus coordinated specialisation.** Small group sizes (lower  $n$ ),  
 207 relatively more important cooperation (higher  $h/b$ ), and lower relative metabolic costs to  
 208 coordination (lower  $\gamma$ ) favour division of labour by coordinated specialisation (black) over  
 209 division of labour by random specialisation (white). Here we have used  $\gamma = 2 \times 10^{-3}$  (solid  
 210 boundary) and  $\gamma = 1 \times 10^{-3}$  (dashed boundary). We note that the limit as the relative  
 211 importance of cooperation goes to infinity (very large  $h/b$ ) converges to the outcome for  
 212 when cooperation is essential ( $b = 0$ ).  
 213

214 Prediction 1: Smaller relative metabolic costs of coordination favour coordinated  
 215 specialisation.

216 When the metabolic cost of coordination is smaller (lower  $c_C$ ) and the metabolic cost of  
 217 random specialisation is larger (higher  $c_R$ ), then the relative cost of switching from  
 218 random specialisation to coordinated specialisation is lessened (smaller  $\gamma$ ), which  
 219 favours the evolution of coordinated specialisation (smaller left-hand side of Condition  
 220 5). If the metabolic costs of random specialisation are equal to or larger than the

221 metabolic costs of coordination ( $c_R \geq c_C \Rightarrow \gamma \leq 0$ ), then coordinated specialisation is  
222 always the favoured mechanism (Condition 5 always satisfied). Conversely, random  
223 specialisation can only ever be the favoured strategy ( $w_R > w_C$ ; Condition 5 not  
224 satisfied) if the metabolic costs of random specialisation are less than the metabolic  
225 costs of coordination ( $c_C > c_R \Rightarrow \gamma > 0$ ; a necessary but not sufficient condition). This  
226 arises directly from our starting assumption that coordinated specialisation always  
227 produces groups with the optimal proportion of helpers whereas random specialisation  
228 may often produce groups that are sub-optimal.

229

230 Larger metabolic costs of coordinated specialisation ( $c_R < c_C \Rightarrow \gamma > 0$ ) may be a  
231 reasonable assumption for many biological systems. The metabolic costs of random  
232 specialisation are determined by the production costs of the regulatory proteins  
233 employed in the genetic feedback circuit that amplifies intra-cellular noise<sup>4,5,33,44</sup>. In  
234 contrast, coordinated specialisation requires both an intracellular genetic feedback  
235 circuit and some mechanism by which phenotype is communicated between cells, such  
236 as the costly production and secretion of extra-cellular signalling molecules<sup>1,2,9,39,45,46</sup>.

237

238 As a result, in many scenarios, the optimal mechanism to divide labour depends on how  
239 the potentially higher metabolic costs of coordination ( $c_C > c_R \Rightarrow \gamma > 0$ ) balance against  
240 the benefit of avoiding the stochastic costs of random specialisation (right-hand side of  
241 Condition 5). The stochastic costs of random specialisation are determined entirely by:  
242 (i) the relative likelihood that random groups deviate from the optimal proportion of  
243 helpers, and (ii) the degree to which those deviations from the optimal proportion of

244 helpers leads to a reduced fecundity for the group (Supplementary Section C). Equation  
245 (5) shows how the importance of these two factors depends upon the size of the group  
246 ( $n$ ) and on the relative importance of cooperation ( $h/b$ ).

247

248 Prediction 2. Smaller social groups favour coordinated specialisation.

249 The number of cells in the group has a large impact on the relative likelihood that  
250 random groups deviate from the optimal proportion of helpers (Fig. 3). In smaller  
251 groups, there are fewer possible outcomes for the proportion of helpers ( $n + 1$  possible  
252 allocations of labour for groups of size  $n$ ). Consequently, random specialisation can  
253 more easily lead to the formation of groups with a realised proportion of helpers that  
254 deviates significantly from the optimum ( $p \ll p^*$  or  $p \gg p^*$ ). In contrast, in larger groups  
255 there are more possible outcomes and the resulting proportion of helpers will be more  
256 closely clustered about the optimal composition with highest fitness (with  $p \approx p^*$  for very  
257 large group sizes).

258

259 This effect of group size on the stochastic cost of random specialisation is a  
260 consequence of the law of large numbers. For example, outcomes close to 50% heads  
261 are much more likely when tossing 100 coins in a row compared to only tossing 4 coins  
262 in a row where no heads or all heads may frequently occur. Our prediction is related to  
263 how, when mating occurs in small groups, small brood sizes select for more precise and  
264 less female biased sex ratios as there would otherwise be a high probability of  
265 producing a group containing no males at all<sup>47-49</sup>. In another analogue, Wahl showed a  
266 mechanistically different effect when division of labour is determined genetically and the

267 number of group founders is small: groups may sometimes form that do not contain all  
268 of the genotypes required to produce all of the necessary phenotypes in the division of  
269 labour<sup>24</sup>.

270

271 Prediction 3: The higher the relative importance of cooperation, the more coordinated  
272 specialisation is favoured.

273 When the relative importance of cooperation is larger (higher  $h/b$ ), the fitness costs  
274 incurred from producing too few helpers increases. In addition, as the relative  
275 importance of cooperation increases (higher  $h/b$ ), the optimal proportion of helpers  
276 increases to 50% helpers ( $p^* \approx \frac{1}{2}$ ). This increases the variance in the proportion of  
277 helpers produced by random specialisers, and so sub-optimal groups may arise even  
278 more frequently (Supplementary Section C). Thus, a higher relative importance of  
279 cooperation increases both (i) the likelihood that groups deviate from the optimal  
280 proportion of helpers and (ii) the scale of the fitness cost when they do. Both of these  
281 effects increase the stochastic costs of random specialisation (larger right-hand side of  
282 Condition 5), and thus favour the evolution of coordinated specialisation (Fig. 3).

283

### 284 **Alternative forms of cooperation**

285 The above analysis employs a deliberately simple public goods model, focusing on  
286 factors that are expected to be relevant across many microbial systems. This facilitates  
287 the interpretation of our results and generates broadly applicable predictions that are  
288 less reliant on the details of particular species.

289

290 In order to test the robustness of our results (predictions 1-3) we also developed a  
291 series of alternative simplified models corresponding to different biological scenarios  
292 (Supplementary sections D and E; Supplementary Figs. 1-3). We examined the  
293 possibility that the public good provided by helpers: (i) is not consumed by its  
294 beneficiaries, as may occur when self-sacrificing *S. enterica* cells enter the gut to trigger  
295 an immune response that eliminates competitors (non-rivalrous or non-congestible  
296 collective good); or (ii) is only consumed by the reproductives in the group, as may  
297 preferentially occur for the fixed nitrogen secreted by heterocyst cells in *A. cylindrica*  
298 filaments (excludible or club good)<sup>9,12,50,51</sup>. We allowed for reproductive fecundity to  
299 depend non-linearly on the proportion of helpers in the group, for helpers to have some  
300 fecundity (non-sterile helpers), and for division of labour to occur in each generation of  
301 group growth. In all of these alternative scenarios, we found broad qualitative  
302 agreement across the three predictions of the linear public goods model.

303

304 We found that less specialised helpers (with some fecundity) favour random  
305 specialisation over coordinated specialisation. In contrast to prediction 3, more fecund  
306 helpers can lead to a scenario where a larger relative importance of cooperation (higher  
307  $h/b$ ) disfavors coordinated specialisation. This occurs because a high relative  
308 importance of cooperation (higher  $h/b$ ) can produce groups composed predominantly of  
309 non-sterile helpers ( $p^* \approx 1$ ), where the likelihood that random groups deviate from the  
310 optimal proportion of helpers is significantly diminished (Supplementary Section E.4).

311

312 In Supplementary Section F we develop an individual based simulation, which also  
313 supports predictions 1-3. In addition, this simulation shows that costly coordination can  
314 evolve incrementally from random specialisation, and that intermediate levels of  
315 coordination can be favoured (Supplementary Fig. 4).

316

### 317 **Division of labour in a cyanobacteria filament**

318 We then developed a more mechanistically detailed model of a growing cyanobacteria  
319 filament to investigate the impact of within-group spatial structure (Supplementary  
320 Section G). When there is insufficient fixed nitrogen ( $N_2$ ) in the environment, some  
321 cyanobacteria species will facultatively divide labour between reproductive cells  
322 (autotrophs) that photosynthesise light and sterile helper cells (heterocysts) that fix and  
323 secrete environmental  $N_2$  (Fig. 1B)<sup>9,52,53</sup>. The fixed  $N_2$  diffuses along the filament where  
324 it is used by reproductives to grow and produce new cells. Division of labour in  
325 cyanobacteria is a canonical example of coordinated specialisation as helpers produce  
326 a variety of signalling molecules that diffuse along the filament to ensure that a regular  
327 pattern of phenotypes develops (Fig. 1B)<sup>9,52,53</sup>. Previous models of cyanobacteria  
328 focused on determining the signalling and regulatory network required to recreate the  
329 exact pattern of heterocysts along the filament<sup>52,54–58</sup>.

330

331 Cyanobacteria spores (hormogonium) tend to contain multiple cells<sup>9,52</sup>. In order to  
332 consider the case where cooperation is essential, we assume that each filament begins  
333 as a clonal sequence of two reproductives (R) and two helpers (H) in the arrangement  
334 H-R-R-H. In Supplementary Section G.4, we find that same qualitative results for the



335 alternative assumption where all spore cells are reproductive (R-R-R-R). Over time, the  
336 number of cells in the filament increases as reproductives grow and divide by binary  
337 fission to produce within-filament offspring cells, which become either helpers or  
338 reproductives (Fig. 4A). The group life cycle ends when the filament has reached a  
339 maximum size of  $L$  cells. At this time, the reproductives in the filament produce  
340 dispersing spores that found filaments in the next generation of the group life cycle and  
341 all remaining cells die (non-overlapping generations)<sup>9</sup>.

342

343 Reproductives grow over time by absorbing fixed  $N_2$ , until they reach a critical size for  
344 cellular replication. Each reproductive receives fixed  $N_2$  from the abiotic environment at  
345 a rate of  $\phi \geq 0$  units of fixed  $N_2$  per unit time (uniform background density of fixed  $N_2$ )<sup>58</sup>.  
346 In addition, each helper in the filament produces fixed  $N_2$ , at a maximum rate of  $\bar{\phi} > 0$   
347 units of fixed  $N_2$  per unit time. We assume that the fixed  $N_2$  produced by a helper  
348 disperses across the filament with a diffusion factor,  $0 < \eta \leq 1$ , where limited diffusivity  
349 (small  $\eta$ ) means that only reproductives near the helper benefit from the fixed  $N_2$  it  
350 produces and high diffusivity (large  $\eta$ ) means that even distant reproductives along the  
351 filament benefit. For the purposes of a focused analysis on reproductive division of  
352 labour, we ignore other forms of phenotypic heterogeneity that cyanobacteria filaments  
353 may engage in, such as the production of ATP for the group by autotrophs (non-  
354 reproductive division of labour) and the formation of persister cells in some  
355 environments (bet-hedging)<sup>1,53</sup>.

356

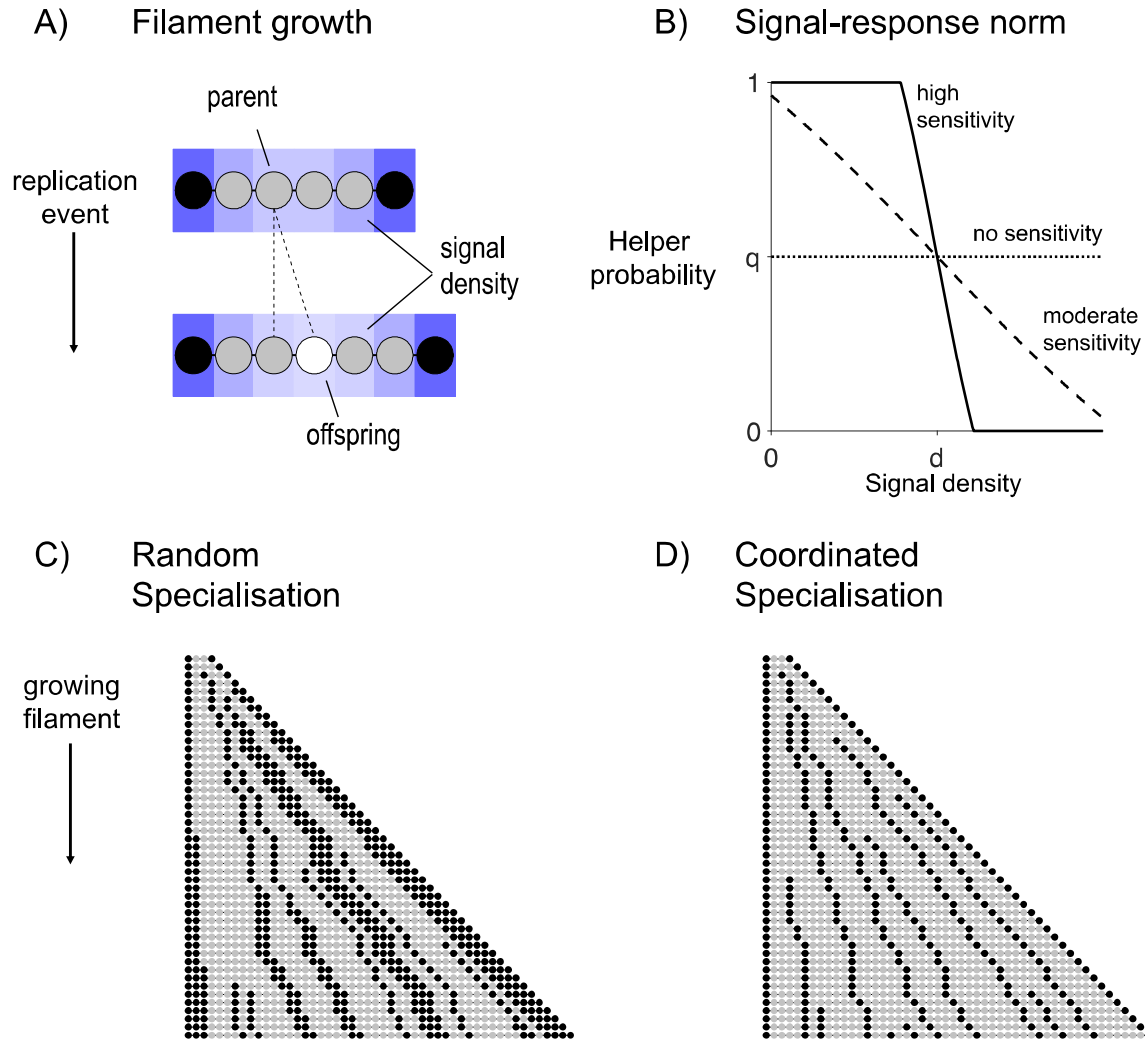

357

358 **Figure 4: Division of labour in a cyanobacteria filament.** (A) Black cells represent  
 359 helpers, and grey cells reproductives. When a reproductive replicates, the parent cell  
 360 produces an offspring cell (white cell) to one side of itself along the filament. The blue  
 361 shading shows the density of the signal molecule produced by the helpers as it diffuses  
 362 along the filament. (B) When an offspring cell is sensitive to the signal ( $v > 0$ ), a greater  
 363 (lesser) signal density will decrease (increase) the probability that it becomes a helper  
 364 ( $q = 0.5, d = 5, v = 0, 0.2, 1$ ). (C) A simulated example of a filament growing that  
 365 employs random specialisation ( $q = 0.33, s = 0, d = 0$ , and  $v = 0$ ). (D) A simulated  
 366 example of a filament growing that employs coordinated specialisation ( $q = 0.33, s =$   
 367  $0.1, d=1$  and  $v = 1.5$ ) (Supplementary Section G). The helper cells (black) are more  
 368 evenly spaced out (less clumped) with coordination specialisation, compared to random  
 369 specialisation.

370

371 Upon replication, whether a new cell becomes a helper or a reproductive depends on

372 four evolutionary traits that jointly determine the extent of division of labour and

373 coordination in the filament ( $q$ ,  $s$ ,  $d$ , and  $v$ ; Fig. 4B). The baseline probability ( $0 \leq q \leq$   
374 1) is the underlying probability that a cell becomes a helper in the absence of  
375 coordination. The level of signalling ( $0 \leq s \leq 1$ ) is the fraction of resources that a helper  
376 commits to the production and secretion of signalling molecules. The signalling  
377 molecules produced by a helper disperses along the filament with a diffusivity that we  
378 assume is distinct from the  $N_2$  diffusivity (Fig. 4A). The local density of signalling  
379 molecules allows new cells to estimate how close they are to a helper, or how many  
380 helpers there may be nearby.

381

382 Whether and how the new cell responds to the signal depends on the response  
383 sensitivity ( $v \geq 0$ ) and the response threshold ( $d \geq 0$ ; Fig. 4B). If  $v = 0$ , then a new cell  
384 is insensitive to the signal and adopts the helper phenotype with the baseline probability  
385  $q$  (random specialisation). If the new cell is sensitive to the signal ( $v > 0$ ) then a local  
386 signal density that is greater than the response threshold,  $d$ , will lead the cell to being  
387 less likely to adopt the helper phenotype (Fig. 4B). A higher signal density than the  
388 threshold produces the opposite effect. As sensitivity increases (higher  $v$ ), the response  
389 to the signal becomes more deterministic (Fig. 4B).

390

391 Increasing levels of coordination (higher  $v$  and  $s$ ), allows for a more precise patterning  
392 of helpers and reproductives in the filament (compare Figs. 4C and 4D). However, we  
393 assume that increased coordination is costly. First, as helpers produce more signalling  
394 molecules (higher  $s$ ), they can produce proportionally less fixed  $N_2$ . Second, new cells  
395 that are more sensitive to the local density of the signalling molecule (higher  $v$ ) incur a

396 more severe time-delay before they can specialise, such that reproductives ultimately  
397 take longer to reach the critical size of replication.

398

399 Cyanobacteria filaments employ such a signalling system and do not simply use the  
400 local density of fixed  $N_2$  as a cue. A possible reason for this is that signalling molecules  
401 could be fast to produce and secrete and thus coordination can occur even before  
402 helpers begin to fix  $N_2$ <sup>57</sup>. Furthermore, using a dedicated signal could be more reliable  
403 than one based on fixed  $N_2$  density alone, which might be biased by transient  
404 fluctuations in the background level of fixed  $N_2$  ( $\phi$ ).

405

## 406 **Simulations**

407 We simulated an evolving population to estimate the strategy that is favoured by natural  
408 selection in different scenarios ( $q^*$ ,  $s^*$ ,  $d^*$ ,  $v^*$ ) (Supplementary Section G). We started  
409 with a uniform population that specialises randomly ( $s = d = v = 0$ ), and allowed the  
410 helper probability ( $q$ ) to mutate and evolve for 500 generations, until an approximate  
411 equilibrium was reached. We then held the baseline helper probability ( $q$ ) fixed and  
412 allowed the coordination traits ( $s$ ,  $d$  and  $v$ ) to mutate and evolve for 3500 generations.  
413 Each generation, the mutant strategy successfully replaces the resident strategy if it has  
414 a higher estimated average fitness. We calculate the fitness of individual filaments as  
415 the summed fecundity of reproductives in the last generation of the group life cycle,  
416 divided by the amount of time that it took the filament to grow to  $L$  cells. The separate  
417 phases of the evolutionary simulation facilitate cleaner convergence of trait-values, with

418 an equilibrium generally being reached within 100-200 generations (Supplementary Fig.  
 419 S5).  
 420  
 421 We found that the degree to which specialising cells evolve to coordinate can depend  
 422 on social and environmental factors. In particular, both a lower background density of  
 423 fixed  $N_2$  (small  $\phi$ ) and more limited diffusion of fixed  $N_2$  along the filament (smaller  $\eta$ )  
 424 lead to the evolution of higher signalling levels (larger  $s^*$ ; Fig. 5A) and higher response  
 425 sensitivities (larger  $v^*$ ; Fig. 5B). This produced filaments with more precise allocation of  
 426 labour across the filament (Fig. 5E). We quantify the extent of coordination by dividing  
 427 the variance in the number of helpers in a contiguous sub-block of 10 cells by the  
 428 variance that would be expected for a binomial random variable of the same mean  
 429 (Supplementary Section G.4.). Higher values of the reciprocal of this ratio suggest more  
 430 precise division of labour.  
 431

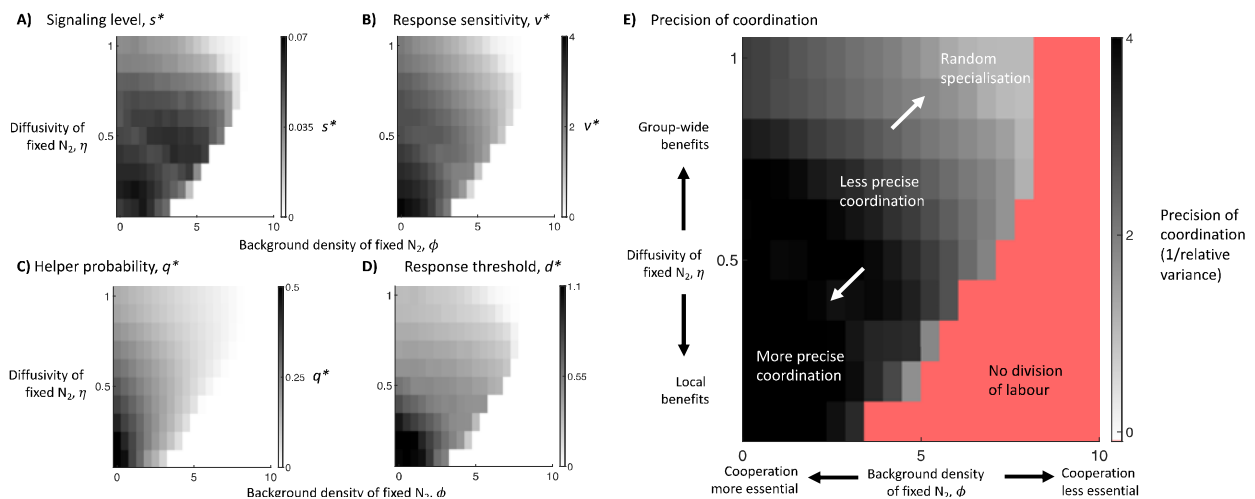

432

433 **Figure 5: The optimal level of coordination.** We present simulation results for two key  
 434 factors that affect the optimal level of coordination (Supplementary Section G.4.) A  
 435 lower background density of fixed  $N_2$  (smaller  $\phi$ ) and more limited diffusion of helper-  
 436 fixed  $N_2$  (smaller  $\eta$ ) favours both: (A) the evolution of a higher level of signalling (larger

437  $s^*$ ); (B) a higher response sensitivity to the signal (larger  $v^*$ ); (C) a higher baseline  
438 helper probability (larger  $q^*$ ); and (D) a higher response threshold (larger  $d^*$ ); (E) The  
439 effect of higher levels of both signalling (larger  $s^*$  in (A)) and response sensitivity (larger  
440  $v^*$  in (B)) is that groups form with more precisely coordinated number of helpers. The  
441 precision of coordination is calculated by dividing the variance in the number of helpers  
442 in a contiguous sub-block of 10 cells relative to the variance that would be expected for  
443 a binomial random variable of the same mean (Supplementary Section G). Higher  
444 values of the reciprocal of this ratio suggest more precisely coordinated division of  
445 labour.

446

447 The predictions of our cyanobacteria model agree broadly with those of our simpler  
448 analytical model. When there is limited diffusion of helper-fixed  $N_2$  (low  $\eta$ ), reproductives  
449 must depend primarily on helpers that are nearer along the filament, producing a  
450 smaller effective social group size (analogous to lower  $n$ ). With random specialisation, a  
451 smaller social group can lead to proportions of helpers that deviate more from the  
452 optimum, increasing the benefit that can be obtained by coordination (Fig. 3). When the  
453 background density of fixed  $N_2$  is small (low  $\phi$ ), this increases the relative benefit of  
454 cooperation (analogous to higher  $h/b$ ). With an increased benefit from cooperation there  
455 is a greater advantage from coordinating to produce the optimum proportion of helpers  
456 (Fig. 3). In addition, our cyanobacteria model shows how intermediate coordination can  
457 be favoured in certain scenarios (Fig. 5).

458

459 However, care is required when examining factors in mechanistic models that can have  
460 additional effects unaccounted for by their analogues in simpler models. For instance,  
461 an increase in the background density of fixed  $N_2$  (higher  $\phi$ ) means that cooperation is  
462 relatively less important (lower  $h/b$ ), which we have found favours less coordination  
463 (Fig. 5). Relatively less important cooperation (lower  $h/b$ ) in the mechanistic model also

464 means that helpers may be willing to dedicate more effort to signal production (higher  $s$ )  
465 as there is then a relatively lower fitness cost to producing less of the public good.  
466 Another example is how helpers that produce more fixed  $N_2$  (larger  $\bar{\phi}$ ) leads to  
467 cooperation that is relatively more important (higher  $h/b$ ) but can also lead to larger  
468 effective social groups sizes (larger  $n$ ) as the increased good that helpers produce can  
469 then diffuse further along the filament and benefit reproductives that are farther away.

470

### 471 **Spatial structure and helper clumping**

472 Our simulations show that coordination ( $s^* > 0, v^* > 0$ ) is often favoured over random  
473 specialisation ( $s^* \approx 0, v^* \approx 0$ ; Figs. 5A and 5B). In social groups with rigid spatial  
474 structure and local cooperation (lower  $\eta$ ), an effective division of labour requires a  
475 regular distribution of helpers across the group. We hypothesized that random  
476 specialisation is particularly disadvantageous in such groups because it can lead to  
477 contiguous groups of helpers (clumps) that expand as the whole group grows (compare  
478 Figs. 4C and 4D; Supplementary Fig. S7). The helpers within these clumps can neither  
479 reproduce to break up the clump, nor are they close enough to reproductives to provide  
480 fixed  $N_2$ . We performed additional simulations to investigate the likelihood and impact of  
481 helper clumping in growing filaments.

482

483 We found that a lower background density of fixed  $N_2$  (smaller  $\phi$ ) and more limited  
484 diffusion of fixed  $N_2$  (smaller  $\eta$ ), leads to randomly specialising filaments with a larger  
485 average clump size (measured in number of helpers per clump; Fig. 6A), and a higher  
486 cost of clumping (measured as the slope of the best-fit line of average clump size on

487 relative filament fitness; Fig. 6B). A higher propensity to form clumps arises because a  
488 lower background density of fixed  $N_2$  (smaller  $\phi$ ) and more limited diffusion of fixed  $N_2$   
489 (smaller  $\eta$ ) means new cells are more likely to become helpers (larger  $q^*$ ; Fig. 5C). A  
490 higher cost to clumping arises in this case (smaller  $\phi$  and  $\eta$ ) because reproductives that  
491 are far from helpers have much lower fecundity, which increases the pressure for an  
492 even distribution of helpers. Combined, these patterns help to explain why random  
493 specialisation is disfavoured in this extreme (lower left corner of Figs. 5A, 5B, and 5E).

494

495 Focusing on the extreme case of essential cooperation ( $\phi = 0$ ) and very low diffusion of  
496 fixed  $N_2$  ( $\eta = 0.1$ ), we found that coordination has two effects on clumping. Firstly, the  
497 fitness cost of clumping is more severe in coordinated filaments than for randomly  
498 specialising filaments (Fig. 6D). This occurs because coordinated helpers also invest in  
499 signalling molecules and so produce less of the public good than randomly specialised  
500 helpers, which amplifies the costs of clumping. However, secondly, coordination leads  
501 to a large reduction in the average size of clumps, and so the cost associated with  
502 larger clumps is almost never paid (Figs. 6C and 6D). Consequently, coordination  
503 ( $s^* > 0, v^* > 0$ ) can produce a substantial fitness advantage in spatial groups by  
504 decreasing the chance that costly helper clumps can form and grow.

505



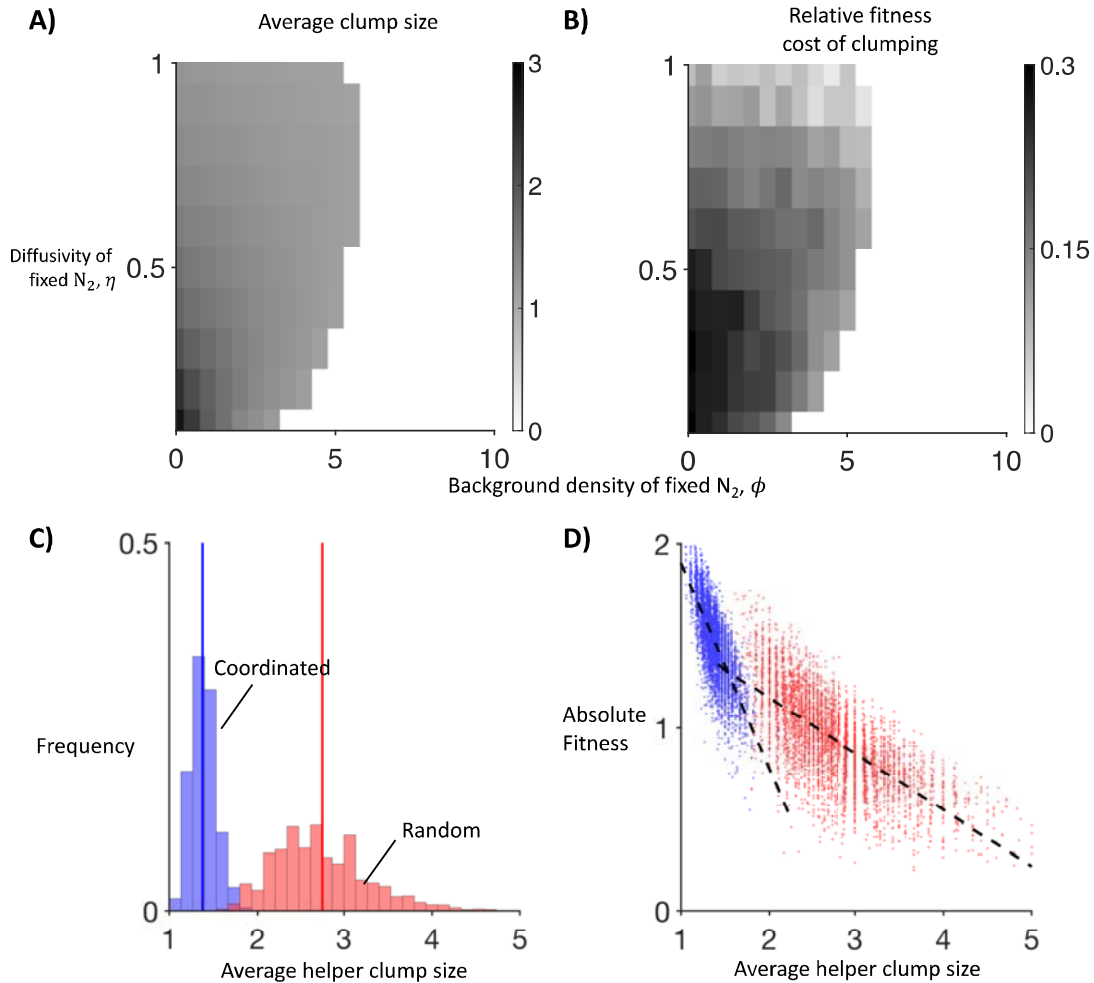

506

507 **Figure 6: Spatial structure and helper clumping.** We found that a smaller  
 508 background density of fixed  $N_2$  (smaller  $\phi$ ) and more limited diffusion of helper-fixed  $N_2$   
 509 (smaller  $\eta$ ), lead to filaments with: (A) a larger average clump size, measured as the  
 510 average number of helpers per clump; and (B) a higher fitness cost of clumping,  
 511 measured as the slope of the least-squares linear regression of relative fitness on  
 512 average clump size. We constructed (A) & (B) by performing 1000 independent  
 513 simulations of growing filaments for each parameter combination, where the trait values  
 514 are set to the associated optima determined in the previous analysis ( $q^*$ ,  $s^*$ ,  $d^*$  and  $v^*$ ).  
 515 We then performed 5000 independent simulations of both coordinated (blue) and  
 516 random (red) filament growth at the extreme case of essential cooperation ( $\phi = 0$ ) and  
 517 very limited diffusion of fixed  $N_2$  ( $\eta = 0.1$ ). (C) Coordination leads to a dramatic  
 518 reduction in average clump sizes across filaments (average clump size for random  
 519 (red): 1.4 helpers and coordinated (blue): 2.7 helpers). (D) The absolute fitness cost of  
 520 larger clumps is greater for coordination specialisation (blue) than for random  
 521 specialisation (red) but filaments that pay the higher cost of coordination are rare. Slope  
 522 of least-squares linear regression for random: -0.29 and coordinated: -1.14. Mean  
 523 squared error of fit for random: 0.0181 and coordinated: 0.0297.

524

525 **DISCUSSION**

526 Our analyses provide a theoretical framework to help explain why different species of  
527 microorganisms use different mechanisms to divide labour<sup>2</sup>. While testing our  
528 predictions with a formal comparative analysis would require data from more species,  
529 our predictions can help to understand the mechanisms that have evolved in well  
530 studied examples.

531

532 There are many reasons why coordinated specialisation was favoured to evolve in  
533 cyanobacteria filaments. First, cyanobacteria only divide labour when fixed  $N_2$  is growth-  
534 limiting and so the relative importance of cooperation is high (low  $\phi$  and high  $h/b$ )<sup>9,53,58</sup>.  
535 Second, the fixed nitrogen produced by helpers diffuses across the filament,  
536 preferentially aiding nearby reproductives and so the effective social group size is small  
537 (low  $\eta$  and small  $n$ )<sup>9,46,59</sup>. Third, the initial costs of coordination may have been quite  
538 small as new cells could use the local level of fixed  $N_2$  as a cue (low  $\eta$ )<sup>60</sup>. Finally,  
539 cyanobacteria filaments have a rigid spatial structure with local benefits from  
540 cooperation and thus random specialisation could have led to the accumulation of large  
541 sterile clumps.

542

543 Colonies of *Volvox carteri* and *Dictyostelium discoideum* use coordination to divide  
544 labour, despite the fact that these groups are composed of large numbers of cells (high  
545  $n$ ; on the order of 1000s of cells or more)<sup>20,61–63</sup>. This highlights that no single factor  
546 can fully explain empirical patterns, and that further factors not captured by simple  
547 models might be relevant in specific cases. For instance, colonies of *Volvox carteri*

548 require a specific spatial distribution of flagella beaters across the group, which may  
549 create a strong selection pressure for coordination, analogous to the avoidance of  
550 clumps in cyanobacteria filaments. Furthermore, in some cases, details of the  
551 mechanism of division of labour are still not well understood. For instance, it is possible  
552 that there is also an initially random component to pre-stalk specialisation in  
553 *Dictyostelium*<sup>62</sup>.

554

555 There are multiple reasons why random specialisation would have been favoured to  
556 evolve in other well-studied species. In *Salmonella enterica*, the self-sacrificing helper  
557 cells provide a competitive advantage that eliminates other microbes but is not  
558 “essential” to the replication of *Salmonella* cells (lower  $h/b$ )<sup>12,13</sup>. Further, the benefits of  
559 cooperation are provided to all cells in the co-infection ( $\eta = 1$ ) and so the effective  
560 social group size is reasonably large (higher  $n$ ). Finally, *Salmonella* pathogens do not  
561 have a rigid spatial structure and so there is no scope for the accumulation of growing  
562 helper clumps as for cyanobacteria filaments. In *Bacillus subtilis*, a subset of cells  
563 become helpers that produce and secrete protein degrading proteases<sup>43</sup>. However,  
564 these helper cells are not sterile and so the consequence of deviating from the optimal  
565 caste ratios is reduced (Supplementary Section E.4).

566

567 To conclude, most previous work on phenotypic heterogeneity has tended to be either  
568 mechanistic, focusing on how different phenotypes are produced (caste determination),  
569 or evolutionary, focusing on why heterogeneity is favoured in the first place<sup>1–6,8,11,15,23–</sup>  
570 <sup>28,30,46,62,64–69</sup>. We have used evolutionary models to explain the broader question of why

571 different mechanisms are used in different species<sup>2,3,12,23–25</sup>. Focusing on reproductive  
572 division of labour in microorganisms, we have shown that coordinated specialisation is  
573 more likely to be favoured over random specialisation in small groups, when relative  
574 coordination costs are low, and when there are larger fitness costs to deviating from  
575 optimal caste ratios. We have also shown how these patterns can hold in groups with  
576 spatial structure, where there can be a large pressure for an even distribution of  
577 phenotypes. These results identify social and environmental factors that could help to  
578 explain the distribution of mechanisms to produce phenotypic heterogeneity that have  
579 been observed in bacteria, other microbes, and beyond. Aside from microorganisms,  
580 our results also suggest a hypothesis for why random caste determination has not been  
581 widely observed in animal societies. During the initial evolution of complex animal  
582 societies, group sizes were likely to be small and the relative costs of coordination might  
583 have been minor compared to each individual's day-to-day organismal metabolic  
584 expenditure.

585

## 586 **DATA AND CODE AVAILABILITY**

587 All simulated data was generated using C and Matlab. The codes and generated data  
588 used for this study are available at:

589 [https://github.com/mingpapilio/Codes\\_DOL\\_Mechanisms](https://github.com/mingpapilio/Codes_DOL_Mechanisms).

590

## 591 **ACKNOWLEDGEMENTS**

592 We thank: Anna Dewar, Kevin Foster, Andy Gardner, Ashleigh Griffin, Asher Leeks,  
593 Matishalin Patel, Tom Scott, and Daniel Unterwegger for their helpful comments and  
594 suggestions; St. John's College, Oxford (GAC), the French National Research Agency  
595 (ANR) under the Investments for the Future (Investissements d'Avenir) program (grant  
596 ANR-17-EURE-0010 to the IAST; JP) and the ERC (Horizon 2020 Advanced Grant

597 834164; SAW) for funding. The authors would like to acknowledge the use of the  
598 University of Oxford Advanced Research Computing (ARC) facility in carrying out this  
599 work. (<http://dx.doi.org/10.5281/zenodo.22558>).  
600

## 601 REFERENCES

- 602 1. Ackermann, M. A functional perspective on phenotypic heterogeneity in  
603 microorganisms. *Nat. Rev. Microbiol.* **13**, 497–508 (2015).
- 604 2. West, S. A. & Cooper, G. A. Division of labour in microorganisms: An evolutionary  
605 perspective. *Nat. Rev. Microbiol.* **14**, 716–723 (2016).
- 606 3. Schwander, T., Lo, N., Beekman, M., Oldroyd, B. P. & Keller, L. Nature versus  
607 nurture in social insect caste differentiation. *Trends Ecol. Evol.* **25**, 275–282  
608 (2010).
- 609 4. Smits, W. K., Kuipers, O. P. & Veening, J. W. Phenotypic variation in bacteria:  
610 The role of feedback regulation. *Nat. Rev. Microbiol.* **4**, 259–271 (2006).
- 611 5. Veening, J.-W., Smits, W. K. & Kuipers, O. P. Bistability, Epigenetics, and Bet-  
612 Hedging in Bacteria. *Annu. Rev. Microbiol.* **62**, 193–210 (2008).
- 613 6. Duarte, A., Pen, I., Keller, L. & Weissing, F. J. Evolution of self-organized division  
614 of labor in a response threshold model. *Behav. Ecol. Sociobiol.* **66**, 947–957  
615 (2012).
- 616 7. Maynard Smith, J. & Harper, D. *Animal signals*. (Oxford University Press, 2003).
- 617 8. Linksvayer, T. A. *et al.* Larval and nurse worker control of developmental plasticity  
618 and the evolution of honey bee queen-worker dimorphism. *J. Evol. Biol.* **24**, 1939–  
619 1948 (2011).
- 620 9. Flores, E. & Herrero, A. Compartmentalized function through cell differentiation in  
621 filamentous cyanobacteria. *Nat. Rev. Microbiol.* **8**, 39–50 (2010).
- 622 10. Weaver, N. Rearing of Honeybee Larvae on Royal Jelly in the Laboratory.  
623 *Science (80- )*. **121**, 509–510 (1955).
- 624 11. Dubnau, D. & Losick, R. Bistability in bacteria. *Mol. Microbiol.* **61**, 564–572  
625 (2006).
- 626 12. Ackermann, M. *et al.* Self-destructive cooperation mediated by phenotypic noise.  
627 *Nature* **454**, 987–990 (2008).
- 628 13. Diard, M. *et al.* Stabilization of cooperative virulence by the expression of an  
629 avirulent phenotype. *Nature* **494**, 353–356 (2013).
- 630 14. Hughes, W. O. H., Sumner, S., Van Borm, S. & Boomsma, J. J. Worker caste  
631 polymorphism has a genetic basis in *Acromyrmex* leaf-cutting ants. *Proc. Natl.*  
632 *Acad. Sci. U. S. A.* **100**, 9394–9397 (2003).
- 633 15. Anderson, K. E., Linksvayer, T. a & Smith, C. R. The causes and consequences  
634 of genetic caste determination in ants (Hymenoptera □: Formicidae). *Myrmecol.*  
635 *News* **11**, 119–132 (2008).
- 636 16. Jaffe, R., Kronauer, D. J. C., Kraus, F. B., Boomsma, J. J. & Moritz, R. F. A.  
637 Worker caste determination in the army ant *Eciton burchellii*. *Biol. Lett.* **3**, 513–  
638 516 (2007).
- 639 17. Zhang, Z. *et al.* Antibiotic production in *Streptomyces* is organized by a division of  
640 labor through terminal genomic differentiation. *Sci. Adv.* **6**, eaay5781 (2020).

- 641 18. Shelton, D. E., Desnitskiy, A. & Michod, R. E. Distributions of reproductive and  
642 somatic cell numbers in diverse Volvox (Chlorophyta) species. *Evol. Ecol. Res.*  
643 **14**, 707–727 (2012).
- 644 19. Griesemer, J. The Units of Evolutionary Transition. *Selection* **1**, 67–80 (2001).
- 645 20. Smith, G. M. *A comparative study of the species of Volvox*. *Transactions of the*  
646 *American Microscopical Society* vol. 63 (1944).
- 647 21. Dragoš, A. *et al.* Division of Labor during Biofilm Matrix Production. *Curr. Biol.*  
648 (2018) doi:10.1016/j.cub.2018.04.046.
- 649 22. Dragoš, A. *et al.* Collapse of genetic division of labour and evolution of autonomy  
650 in pellicle biofilms. *Nat. Microbiol.* (2018) doi:10.1038/s41564-018-0263-y.
- 651 23. Wahl, L. M. Evolving the division of labour: Generalists, specialists and task  
652 allocation. *J. Theor. Biol.* **219**, 371–388 (2002).
- 653 24. Wahl, L. M. The Division of Labor: Genotypic versus Phenotypic Specialization.  
654 *Am. Nat.* **160**, 135–145 (2002).
- 655 25. Duarte, A., Weissing, F. J., Pen, I. & Keller, L. An Evolutionary Perspective on  
656 Self-Organized Division of Labor in Social Insects. *Annu. Rev. Ecol. Evol. Syst.*  
657 **42**, 91–110 (2011).
- 658 26. Oster, G. F. & Wilson, E. O. *Caste and ecology in the social insects*. *Caste and*  
659 *ecology in the social insects* (Princeton University Press, 1978).
- 660 27. Wilson, E. O. The ergonomics of caste in the social insects. *Am. Econ. Rev.* **102**,  
661 41–66 (1978).
- 662 28. Duarte, A., Scholtens, E. & Weissing, F. J. Implications of behavioral architecture  
663 for the evolution of self-organized division of labor. *PLoS Comput. Biol.* **8**,  
664 e1002430 (2012).
- 665 29. Waibel, M., Floreano, D., Magnenat, S. & Keller, L. Division of labour and colony  
666 efficiency in social insects: Effects of interactions between genetic architecture,  
667 colony kin structure and rate of perturbations. *Proc. R. Soc. B Biol. Sci.* **273**,  
668 1815–1823 (2006).
- 669 30. Bourke, A. F. G. *Principles of Social Evolution*. *Principles of Social Evolution*  
670 (Oxford University Press, 2011).  
671 doi:10.1093/acprof:oso/9780199231157.001.0001.
- 672 31. Powers, S. T. & Lehmann, L. When is bigger better? The effects of group size on  
673 the evolution of helping behaviours. *Biol. Rev.* (2017) doi:10.1111/brv.12260.
- 674 32. Peña, J. & Nöldeke, G. Group size effects in social evolution. *J. Theor. Biol.*  
675 (2018) doi:10.1016/j.jtbi.2018.08.004.
- 676 33. Davidson, C. J. & Surette, M. G. Individuality in Bacteria. *Annu. Rev. Genet.* **42**,  
677 253–268 (2008).
- 678 34. Süel, G. M., Garcia-Ojalvo, J., Liberman, L. M. & Elowitz, M. B. An excitable gene  
679 regulatory circuit induces transient cellular differentiation. *Nature* **440**, 545–550  
680 (2006).
- 681 35. Balázsi, G., Van Oudenaarden, A. & Collins, J. J. Cellular decision making and  
682 biological noise: From microbes to mammals. *Cell* **144**, 910–925 (2011).
- 683 36. DeLong, E. F. *et al.* Noise in Gene Expression Determines Cell Fate in *Bacillus*  
684 *subtilis*. *Science (80-. )*. **27**, 526–530 (2007).
- 685 37. Parker, G. A. & Maynard Smith, J. Optimality theory in evolutionary biology.  
686 *Nature* **348**, 27–33 (1990).

- 687 38. May, R. M. Uses and Abuses of Mathematics in Biology. *Science* (80-. ). **303**,  
688 790–793 (2004).
- 689 39. van Gestel, J., Vlamakis, H. & Kolter, R. Division of Labor in Bio films□: the  
690 Ecology of Cell Differentiation. *Microb. Biofilms* **3**, 1–24 (2015).
- 691 40. West, S. A., Diggle, S. P., Buckling, A., Gardner, A. & Griffin, A. S. The Social  
692 Lives of Microbes. *Annu. Rev. Ecol. Evol. Syst.* **38**, 53–77 (2007).
- 693 41. Frank, S. A. A general model of the public goods dilemma. *J. Evol. Biol.* **23**,  
694 1245–1250 (2010).
- 695 42. West, S. A. & Buckling, A. Cooperation, virulence and siderophore production in  
696 bacterial parasites. *Proc. R. Soc. B Biol. Sci.* **270**, 37–44 (2003).
- 697 43. Veening, J.-W. *et al.* Transient heterogeneity in extracellular protease production  
698 by *Bacillus subtilis*. *Mol. Syst. Biol.* **4**, 184 (2008).
- 699 44. McAdams, H. H. & Arkin, A. Stochastic mechanisms in gene expression. *Proc.*  
700 *Natl. Acad. Sci.* **94**, 814–819 (1997).
- 701 45. Keller, L. & Surette, M. G. Communication in bacteria□: an ecological and  
702 evolutionary perspective. *Nat. Rev. Microbiol.* **4**, 249–258 (2006).
- 703 46. Rossetti, V., Schirmer, B. E., Bernasconi, M. V. & Bagheri, H. C. The  
704 evolutionary path to terminal differentiation and division of labor in cyanobacteria.  
705 *J. Theor. Biol.* **262**, 23–24 (2010).
- 706 47. West, S. A. & Herre, E. A. Stabilizing Selection and Variance in Fig Wasp Sex  
707 Ratios. *Evolution* (N. Y). **52**, 475–485 (1998).
- 708 48. Nagelkerke, C. J. & Sabelis, M. W. Precise control of sex allocation in pseudo-  
709 arrhenotokous phytoseiid mites. *J. Evol. Biol.* **11**, 649–684 (1998).
- 710 49. Green, R. F., Gordh, G. & Hawkins, B. A. Precise Sex Ratios in Highly Inbred  
711 Parasitic. *Am. Nat.* **120**, 653–665 (1982).
- 712 50. Dionisio, F. & Gordo, I. The Tragedy of the Commons, the Public Good Dilemma  
713 and the Meaning of Rivalry and Excludability in Evolutionary Biology. *Evol. Ecol.*  
714 *Res.* **8**, 321–332 (2006).
- 715 51. Peña, J., Nöldeke, G. & Lehmann, L. Evolutionary dynamics of collective action in  
716 spatially structured populations. *J. Theor. Biol.* (2015)  
717 doi:10.1016/j.jtbi.2015.06.039.
- 718 52. Meeks, J. C. & Elhai, J. Regulation of Cellular Differentiation in Filamentous  
719 Cyanobacteria in Free-Living and Plant-Associated Symbiotic Growth States.  
720 *Microbiol. Mol. Biol. Rev.* **66**, 94–121 (2002).
- 721 53. Herrero, A., Stavans, J. & Flores, E. The multicellular nature of filamentous  
722 heterocyst-forming cyanobacteria. *FEMS Microbiol. Rev.* **40**, 831–854 (2016).
- 723 54. Wolk, C. P. Formation of one-dimensional patterns by stochastic processes and  
724 by filamentous blue-green algae. *Dev. Biol.* **46**, 370–382 (1975).
- 725 55. Gerdtzen, Z. P. *et al.* Modeling heterocyst pattern formation in cyanobacteria.  
726 *BMC Bioinformatics* **10**, 1–13 (2009).
- 727 56. Torres-Sánchez, A., Gómez-Gardeñes, J. & Falo, F. An Integrative Approach for  
728 Modeling and Simulation of Heterocyst Pattern Formation in Cyanobacteria  
729 Filaments. *PLoS Comput. Biol.* **11**, 1–18 (2015).
- 730 57. Muñoz-García, J. & Ares, S. Formation and maintenance of nitrogen-fixing cell  
731 patterns in filamentous cyanobacteria. *Proc. Natl. Acad. Sci. U. S. A.* **113**, 6218–  
732 6223 (2016).

- 733 58. Brown, A. I. & Rutenberg, A. D. Heterocyst placement strategies to maximize the  
734 growth of cyanobacterial filaments. *Phys. Biol.* **9**, (2012).
- 735 59. Co, A. D., van Vliet, S., Kiviet, D. J., Schlegel, S. & Ackermann, M. Short-range  
736 interactions govern the dynamics and functions of microbial communities. *Nat.*  
737 *Ecol. Evol.* **4**, 366–375 (2020).
- 738 60. Brown, J., Sanderson, J. & Michod, E. Evolution of Social Behavior by  
739 Reciprocation. 319–339 (1982).
- 740 61. Kirk, D. L. Germ-soma differentiation in *Volvox*. *Dev. Biol.* **238**, 213–223 (2001).
- 741 62. Strmecki, L., Greene, D. M. & Pears, C. J. Developmental decisions in  
742 *Dictyostelium discoideum*. *Dev. Biol.* **284**, 25–36 (2005).
- 743 63. Maree, A. F. M. & Hogeweg, P. How amoeboids self-organize into a fruiting body:  
744 Multicellular coordination in *Dictyostelium discoideum*. *Proc. Natl. Acad. Sci.* **98**,  
745 3879–3883 (2002).
- 746 64. Kamakura, M. Royalactin induces queen differentiation in honeybees. *Nature* **473**,  
747 478 (2011).
- 748 65. Gavrillets, S. Rapid transition towards the division of labor via evolution of  
749 developmental plasticity. *PLoS Comput. Biol.* **6**, e1000805 (2010).
- 750 66. Ispolatov, I., Ackermann, M. & Doebeli, M. Division of labour and the evolution of  
751 multicellularity. *Proc. R. Soc. B Biol. Sci.* **279**, 1768–1776 (2012).
- 752 67. Cooper, G. A. & West, S. A. Division of labour and the evolution of extreme  
753 specialization. *Nat. Ecol. Evol.* **2**, 1161–1167 (2018).
- 754 68. Linksvayer, T. A. Ant species differences determined by epistasis between brood  
755 and worker genomes. *PLoS One* **2**, e994 (2007).
- 756 69. Walsh, J. T., Warner, M. R., Kase, A., Cushing, B. J. & Linksvayer, T. A. Ant  
757 nurse workers exhibit behavioural and transcriptomic signatures of specialization  
758 on larval stage. *Anim. Behav.* **141**, 161–169 (2018).
- 759  
760



761 **AUTHOR CONTRIBUTIONS**

762 G.A.C., S.A.W., and J.P. conceived the study. G.A.C. and J.P. designed and  
763 analysed the analytical models, G.A.C. and M.L. designed and analysed the simulation  
764 models. G.A.C. and S.A.W. wrote the first draft. All authors contributed toward writing  
765 the final manuscript.

766

767 **COMPETING INTERESTS**

768 The authors declare no competing interests.

769

770 **SUPPLEMENTARY INFORMATION**

771 A. Overview

772 B. Labour dividers and their fitness

773 C. Linear public goods

774 D. Alternative modelling assumptions

775 E. Alternative forms of cooperation

776 F. The optimal level of coordination

777 G. Dividing labour in a cyanobacteria filament

778

779 Supplementary Figure 1. Alternative modelling assumptions

780 Supplementary Figure 2. Non-linear public goods

781 Supplementary Figure 3. Alternative biological scenarios

782 Supplementary Figure 4. The optimal level of coordination

783 Supplementary Figure 5: Convergence to optimal trait values

784 Supplementary Figure 6. Simulation results for alternate starting conditions

785 Supplementary Figure 7. Growing groups produce larger helper clumps

786

787 Supplementary Table 1: Cyanobacteria model
